# Supplementary material for: Significant enhancement of scintillation performance by inducing oxygen vacancies in alkali metal ion (A+ = Li+, Na+, K+)-incorporated (Lu, Sc)BO3:Ce
Source: Royal Society of Chemistry journal article supplement (doi:10.1039/d2dt01432g), 2022-01-01
Supplement: d2dt01432g1.pdf [file d2dt01432g1.pdf]

## Supporting Information

# Significant enhancement of scintillation performance by inducing oxygen vacancy in alkali metal ions ( $A^+ = \text{Li}^+, \text{Na}^+, \text{K}^+$ ) incorporated $(\text{Lu}, \text{Sc})\text{BO}_3:\text{Ce}$

Yun-Ling Yang,<sup>a</sup> Jia-Xuan Chen,<sup>a</sup> Fan Guo,<sup>a</sup> Meng Huang,<sup>a</sup> Shan-Shan Liang,<sup>a</sup>

Qian-Li Li,<sup>a</sup> Jian-Feng Hu,<sup>a</sup> Jing-Tai Zhao,<sup>b</sup> Xing-Yu Gao,<sup>c</sup> Ya-Nan Fu,<sup>c</sup> Hui Lin<sup>d</sup>

and Zhi-Jun Zhang<sup>\*a</sup>

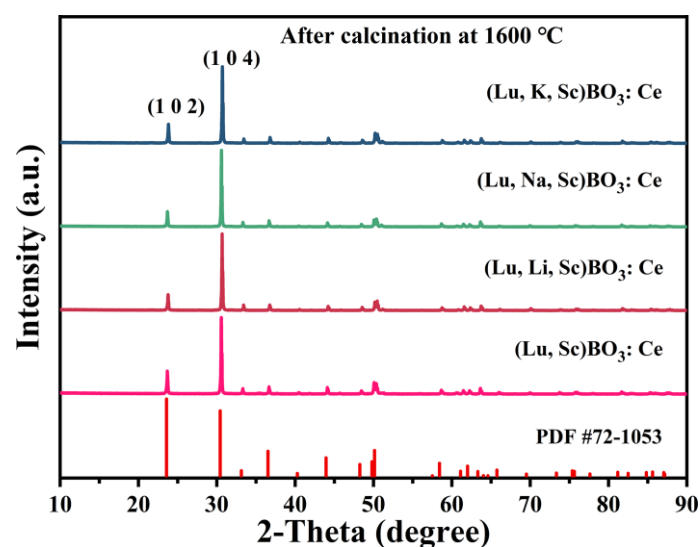

**Figure S1.** XRD patterns of  $\text{LASBO}:\text{Ce}$  ( $x = 0, 0.025$ ) samples after the calcination at 1600 °C.

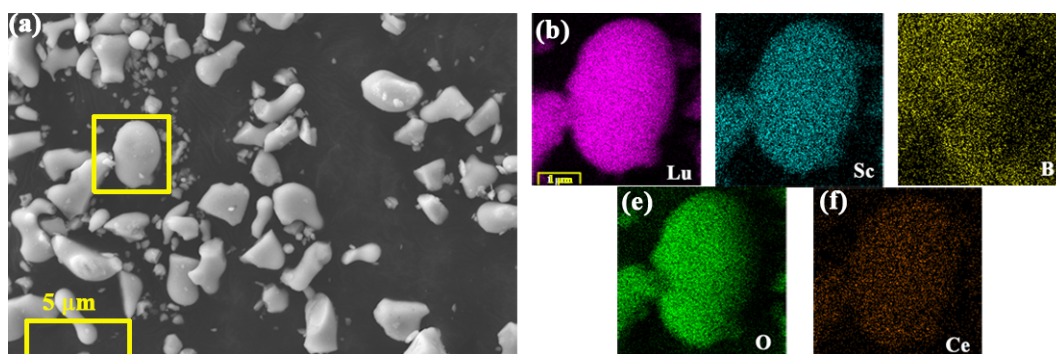

**Figure S2.** (a) FE-SEM image of  $\text{Lu}_{0.765}\text{Li}_{0.025}\text{Sc}_{0.2}\text{BO}_3:\text{Ce}_{0.01}$ . (b - f) Element mapping of Lu, Sc, B, O and Ce.

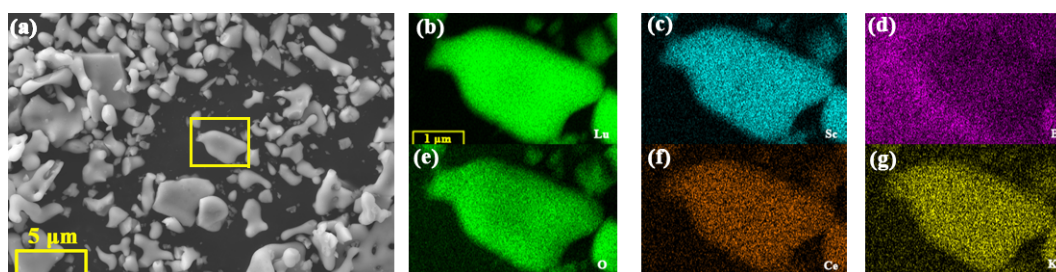

**Figure S3.** (a) FE-SEM image of  $\text{Lu}_{0.765}\text{K}_{0.025}\text{Sc}_{0.2}\text{BO}_3:\text{Ce}_{0.01}$ . (b - g) Element mapping of Lu, Sc, B, O, Ce and K.

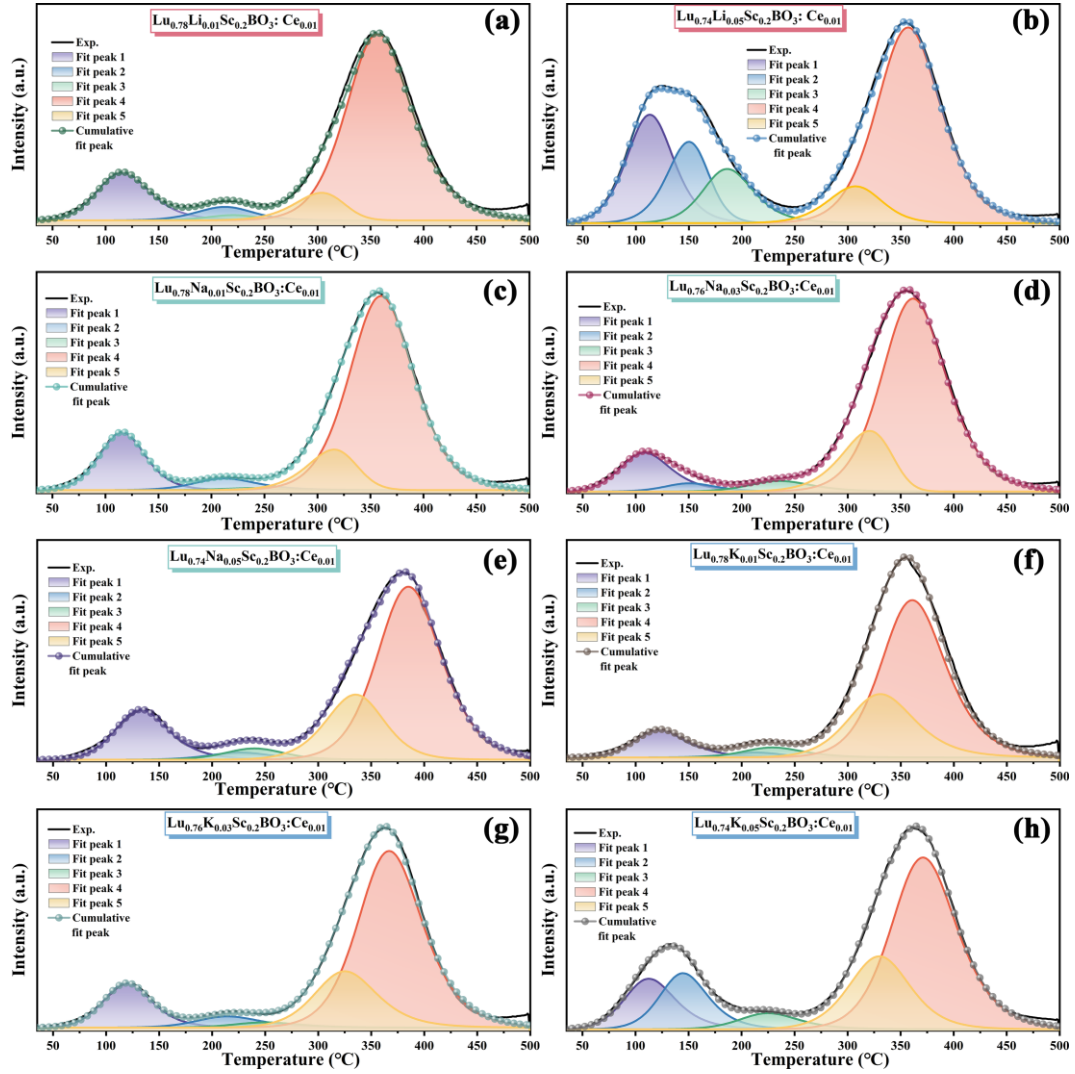

**Figure S4.** (a - h) TL spectra and fitting curves of  $\text{Lu}_{0.79-x}\text{A}_x\text{Sc}_{0.2}\text{BO}_3:\text{Ce}_{0.01}$ .

**Table S1.** Calculated trap depths ( $E_t$ ) and related frequency factor ( $s$ ) of  $\text{Lu}_{0.79-x}\text{A}_x\text{Sc}_{0.2}\text{BO}_3:\text{Ce}_{0.01}$

$x\text{A}_x\text{Sc}_{0.2}\text{BO}_3:\text{Ce}_{0.01}$  ( $x = 0, 0.01, 0.03, 0.05$ ).

| Parameter                            |            | Trap 1           |                            | Trap 2           |                            | Trap 3           |                            | Trap 4           |                            | Trap 5           |                            |
|--------------------------------------|------------|------------------|----------------------------|------------------|----------------------------|------------------|----------------------------|------------------|----------------------------|------------------|----------------------------|
|                                      |            | $E_{t1}$<br>(eV) | $s$<br>( $\text{s}^{-1}$ ) | $E_{t2}$<br>(eV) | $s$<br>( $\text{s}^{-1}$ ) | $E_{t3}$<br>(eV) | $s$<br>( $\text{s}^{-1}$ ) | $E_{t4}$<br>(eV) | $s$<br>( $\text{s}^{-1}$ ) | $E_{t5}$<br>(eV) | $s$<br>( $\text{s}^{-1}$ ) |
| Compounds                            |            |                  |                            |                  |                            |                  |                            |                  |                            |                  |                            |
| <b>LSBO: Ce (<math>x = 0</math>)</b> |            | 0.75             | $10^8$                     | 0.87             | $10^9$                     | 0.91             | $10^{10}$                  | 1.34             | $10^{10}$                  | 1.59             | $10^{11}$                  |
| $\text{A}^+ = \text{Li}^+$           | $x = 0.01$ | 0.73             | $10^8$                     | 0.95             | $10^9$                     | 1.05             | $10^{10}$                  | 1.34             | $10^{10}$                  | 1.55             | $10^{11}$                  |
|                                      | $x = 0.03$ | 0.73             | $10^9$                     | 0.88             | $10^{10}$                  | 1.05             | $10^{11}$                  | 1.35             | $10^{10}$                  | 1.46             | $10^{10}$                  |
|                                      | $x = 0.05$ | 0.75             | $10^9$                     | 0.92             | $10^{10}$                  | 1.07             | $10^{10}$                  | 1.41             | $10^{11}$                  | 1.55             | $10^{11}$                  |
| $\text{A}^+ = \text{Na}^+$           | $x = 0.01$ | 0.78             | $10^9$                     | 0.95             | $10^9$                     | 1.05             | $10^9$                     | 1.43             | $10^{11}$                  | 1.54             | $10^{11}$                  |
|                                      | $x = 0.03$ | 0.75             | $10^9$                     | 0.95             | $10^8$                     | 1.05             | $10^8$                     | 1.34             | $10^{10}$                  | 1.59             | $10^{11}$                  |
|                                      | $x = 0.05$ | 0.67             | $10^8$                     | 0.95             | $10^8$                     | 1.05             | $10^9$                     | 1.47             | $10^{11}$                  | 1.71             | $10^{12}$                  |

|             |            |      |        |      |           |      |           |      |           |      |           |
|-------------|------------|------|--------|------|-----------|------|-----------|------|-----------|------|-----------|
| $A^+ = K^+$ | $x = 0.01$ | 0.74 | $10^8$ | 1.03 | $10^9$    | 1.14 | $10^{10}$ | 1.47 | $10^{11}$ | 1.62 | $10^{11}$ |
|             | $x = 0.03$ | 0.78 | $10^9$ | 0.95 | $10^8$    | 1.07 | $10^9$    | 1.48 | $10^{11}$ | 1.63 | $10^{12}$ |
|             | $x = 0.05$ | 0.74 | $10^8$ | 0.93 | $10^{10}$ | 1.07 | $10^{10}$ | 1.45 | $10^{11}$ | 1.63 | $10^{11}$ |

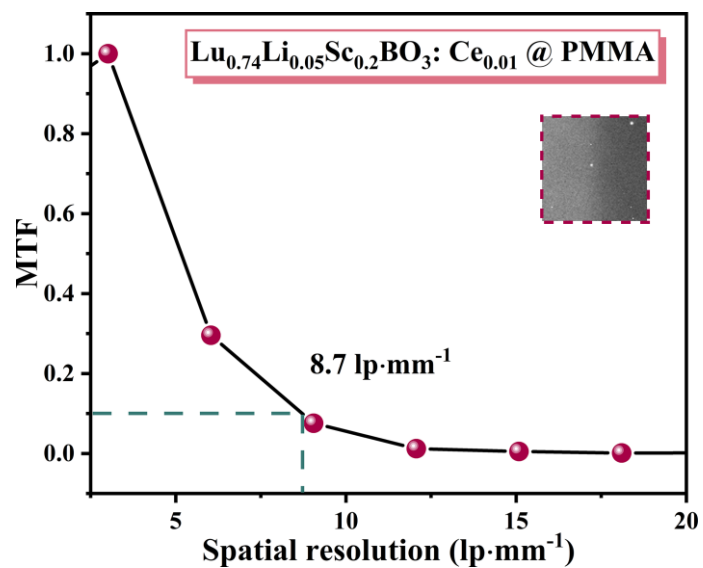

Figure S5. The X-ray imaging corresponding MTF.
